# Supplementary material
Source: publisher figshare collection journal article supplement (https://diabetesjournals.figshare.com/articles/dataset/_/19609827)

Supplemental Figure 1

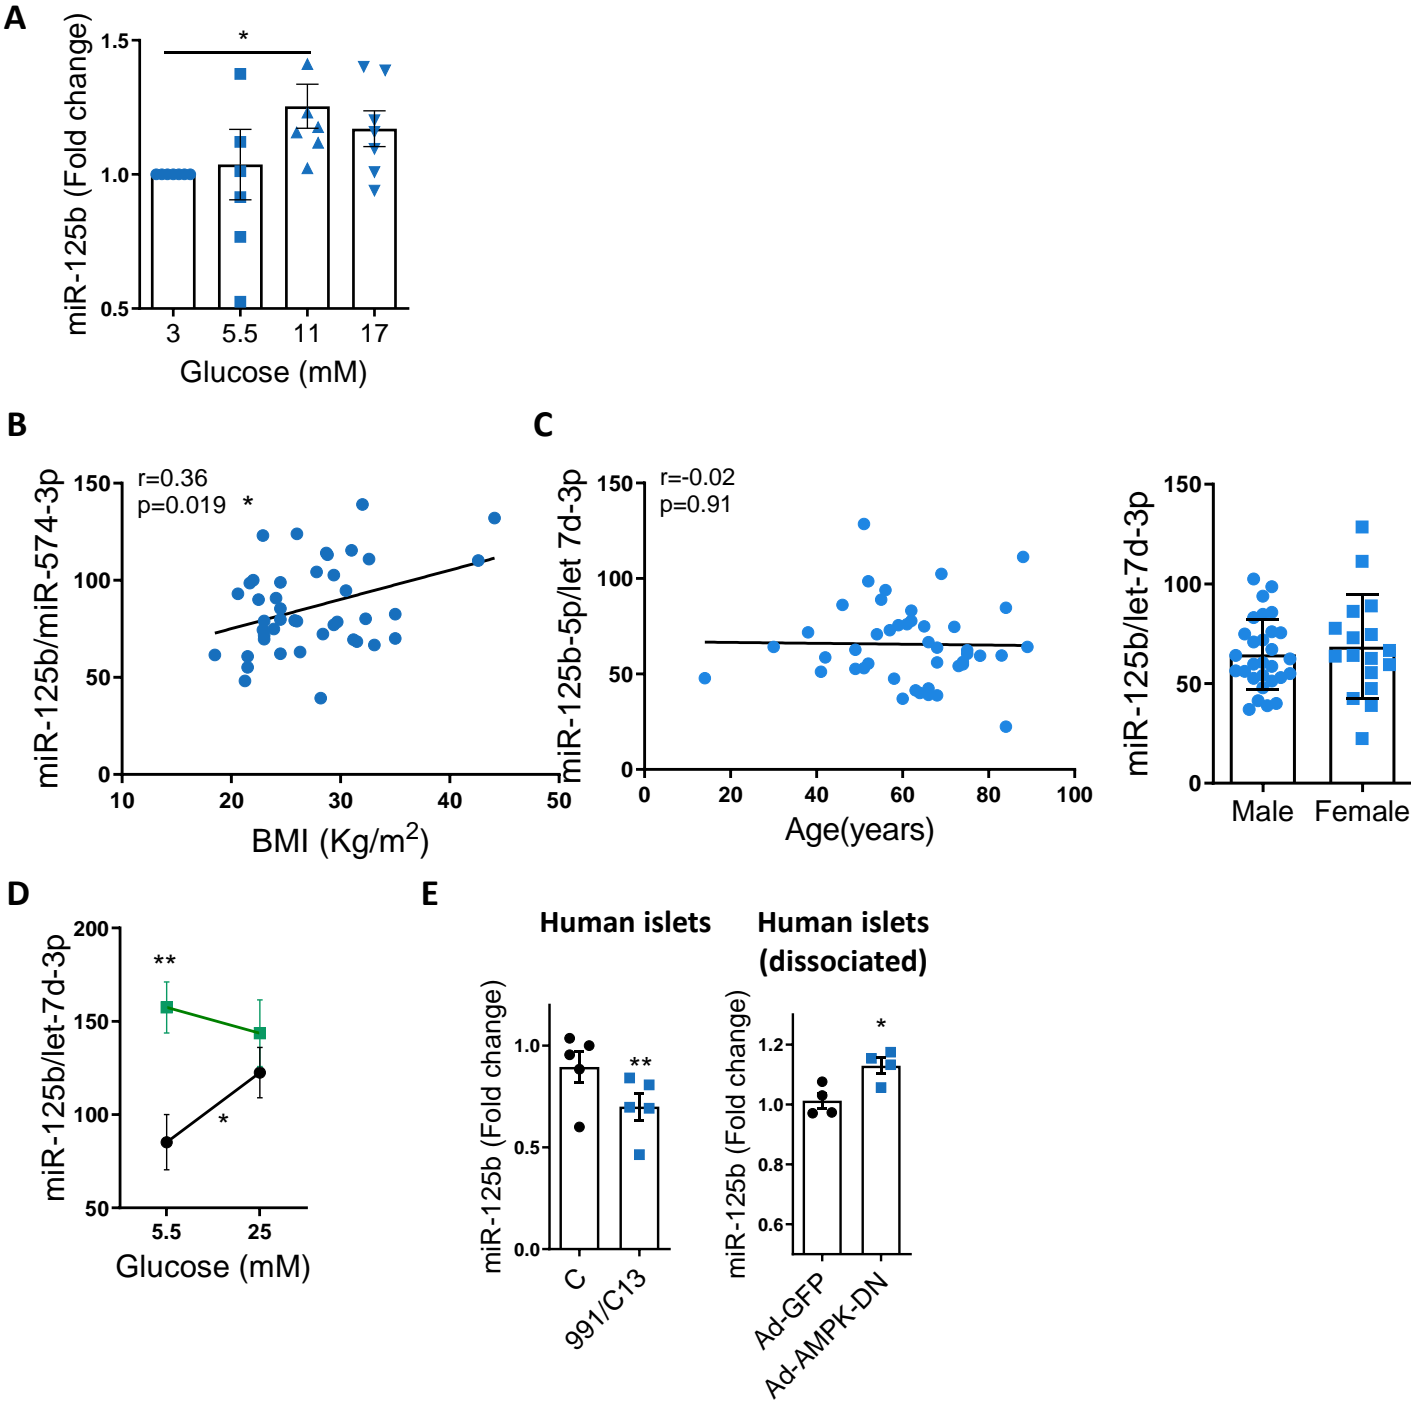

Supplemental Figure 2

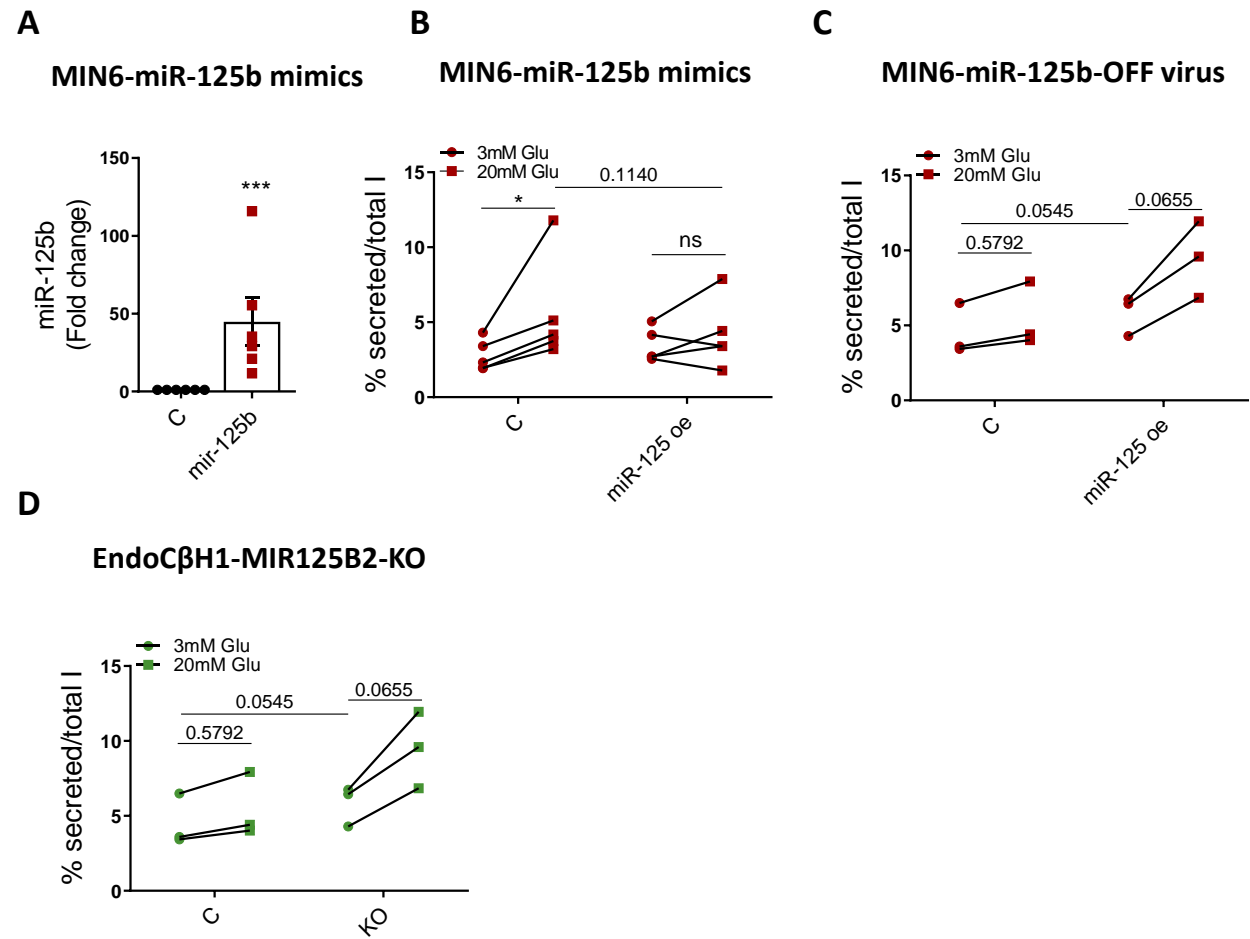

Supplemental Figure 3

A

MIR125B-1

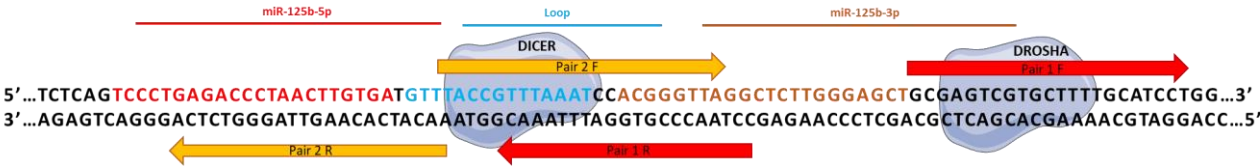

MIR125B-2

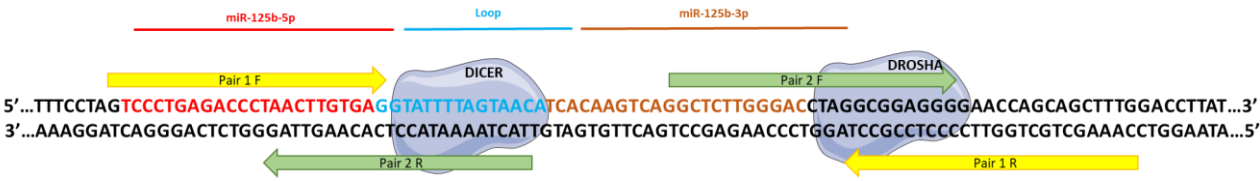

B

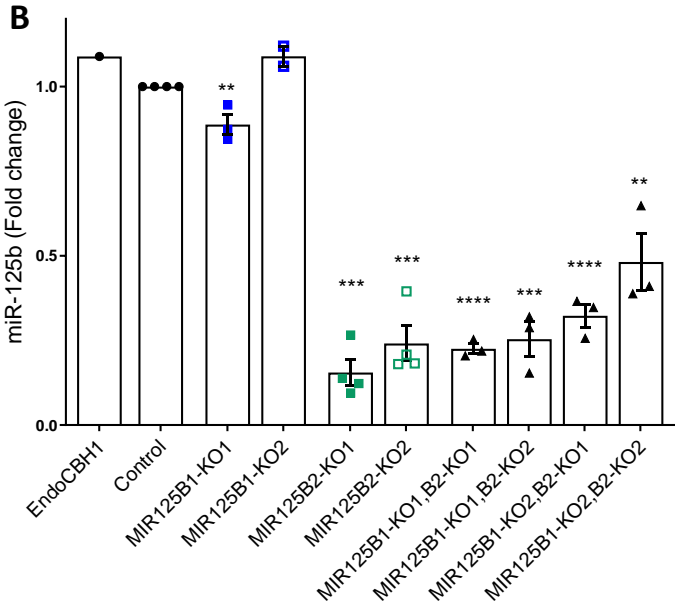

C

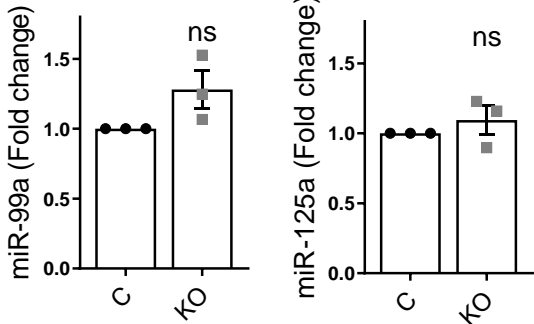

D

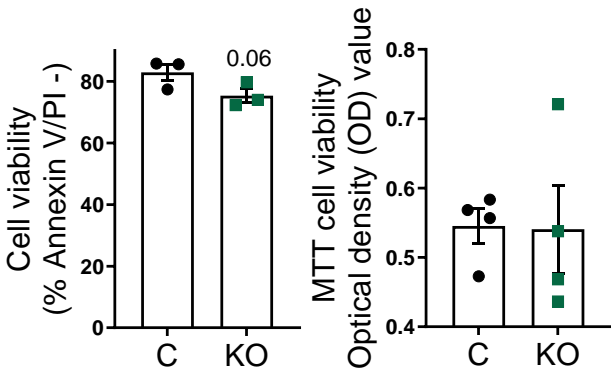

**Supplemental Figure 4.**

**A**

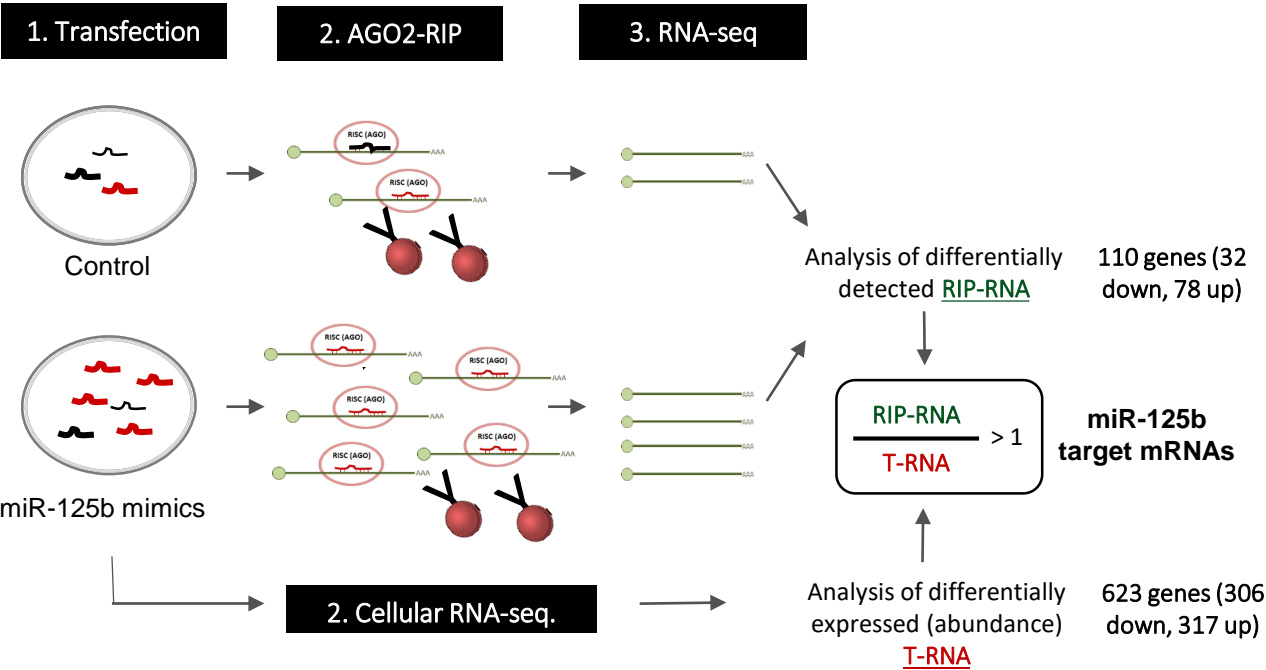

**B**

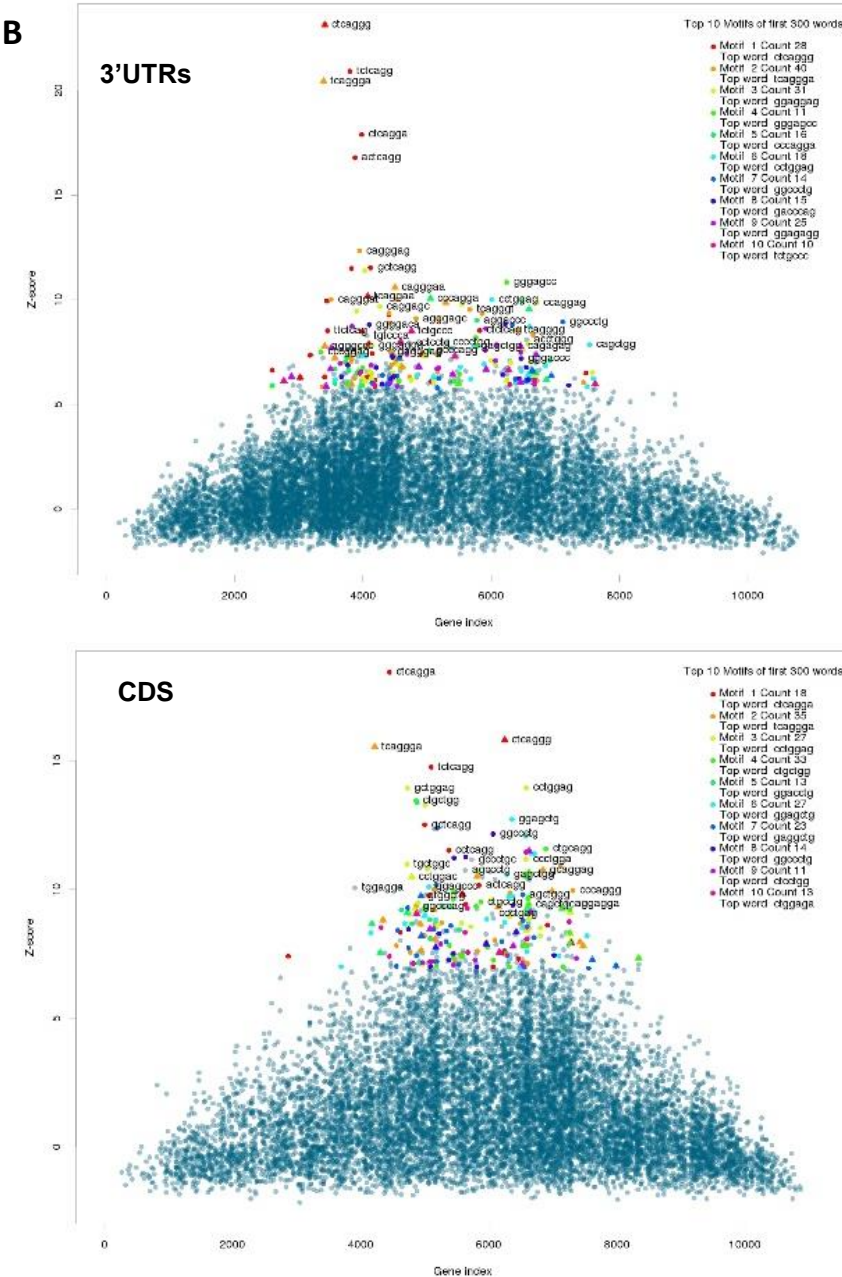

>mmu-miR-125b-5p  
UCCCUGAGACCCUAA  
CUUGUGA  
RC: TCTCAGGGA

Supplemental Figure 5

A

MIN6- miR-125b OE

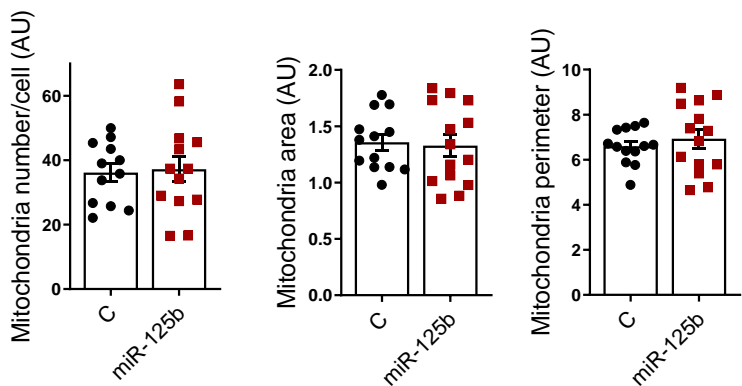

B

EndoCβ-H1-MIR125B2-KO

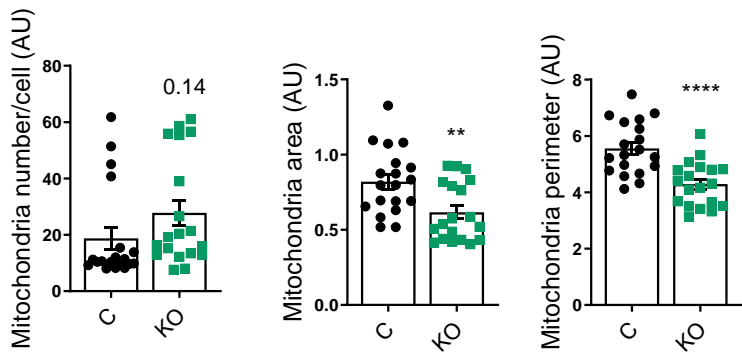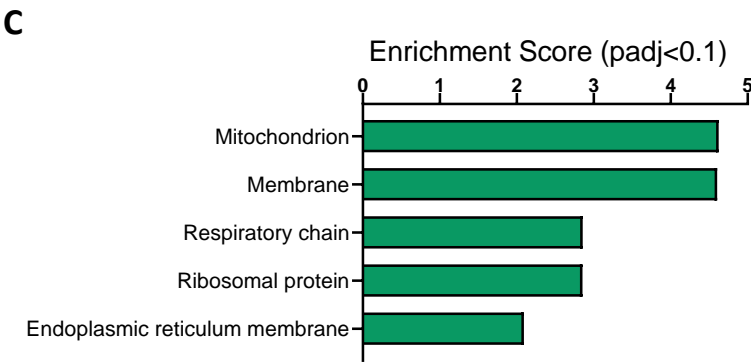

Supplemental Figure 6

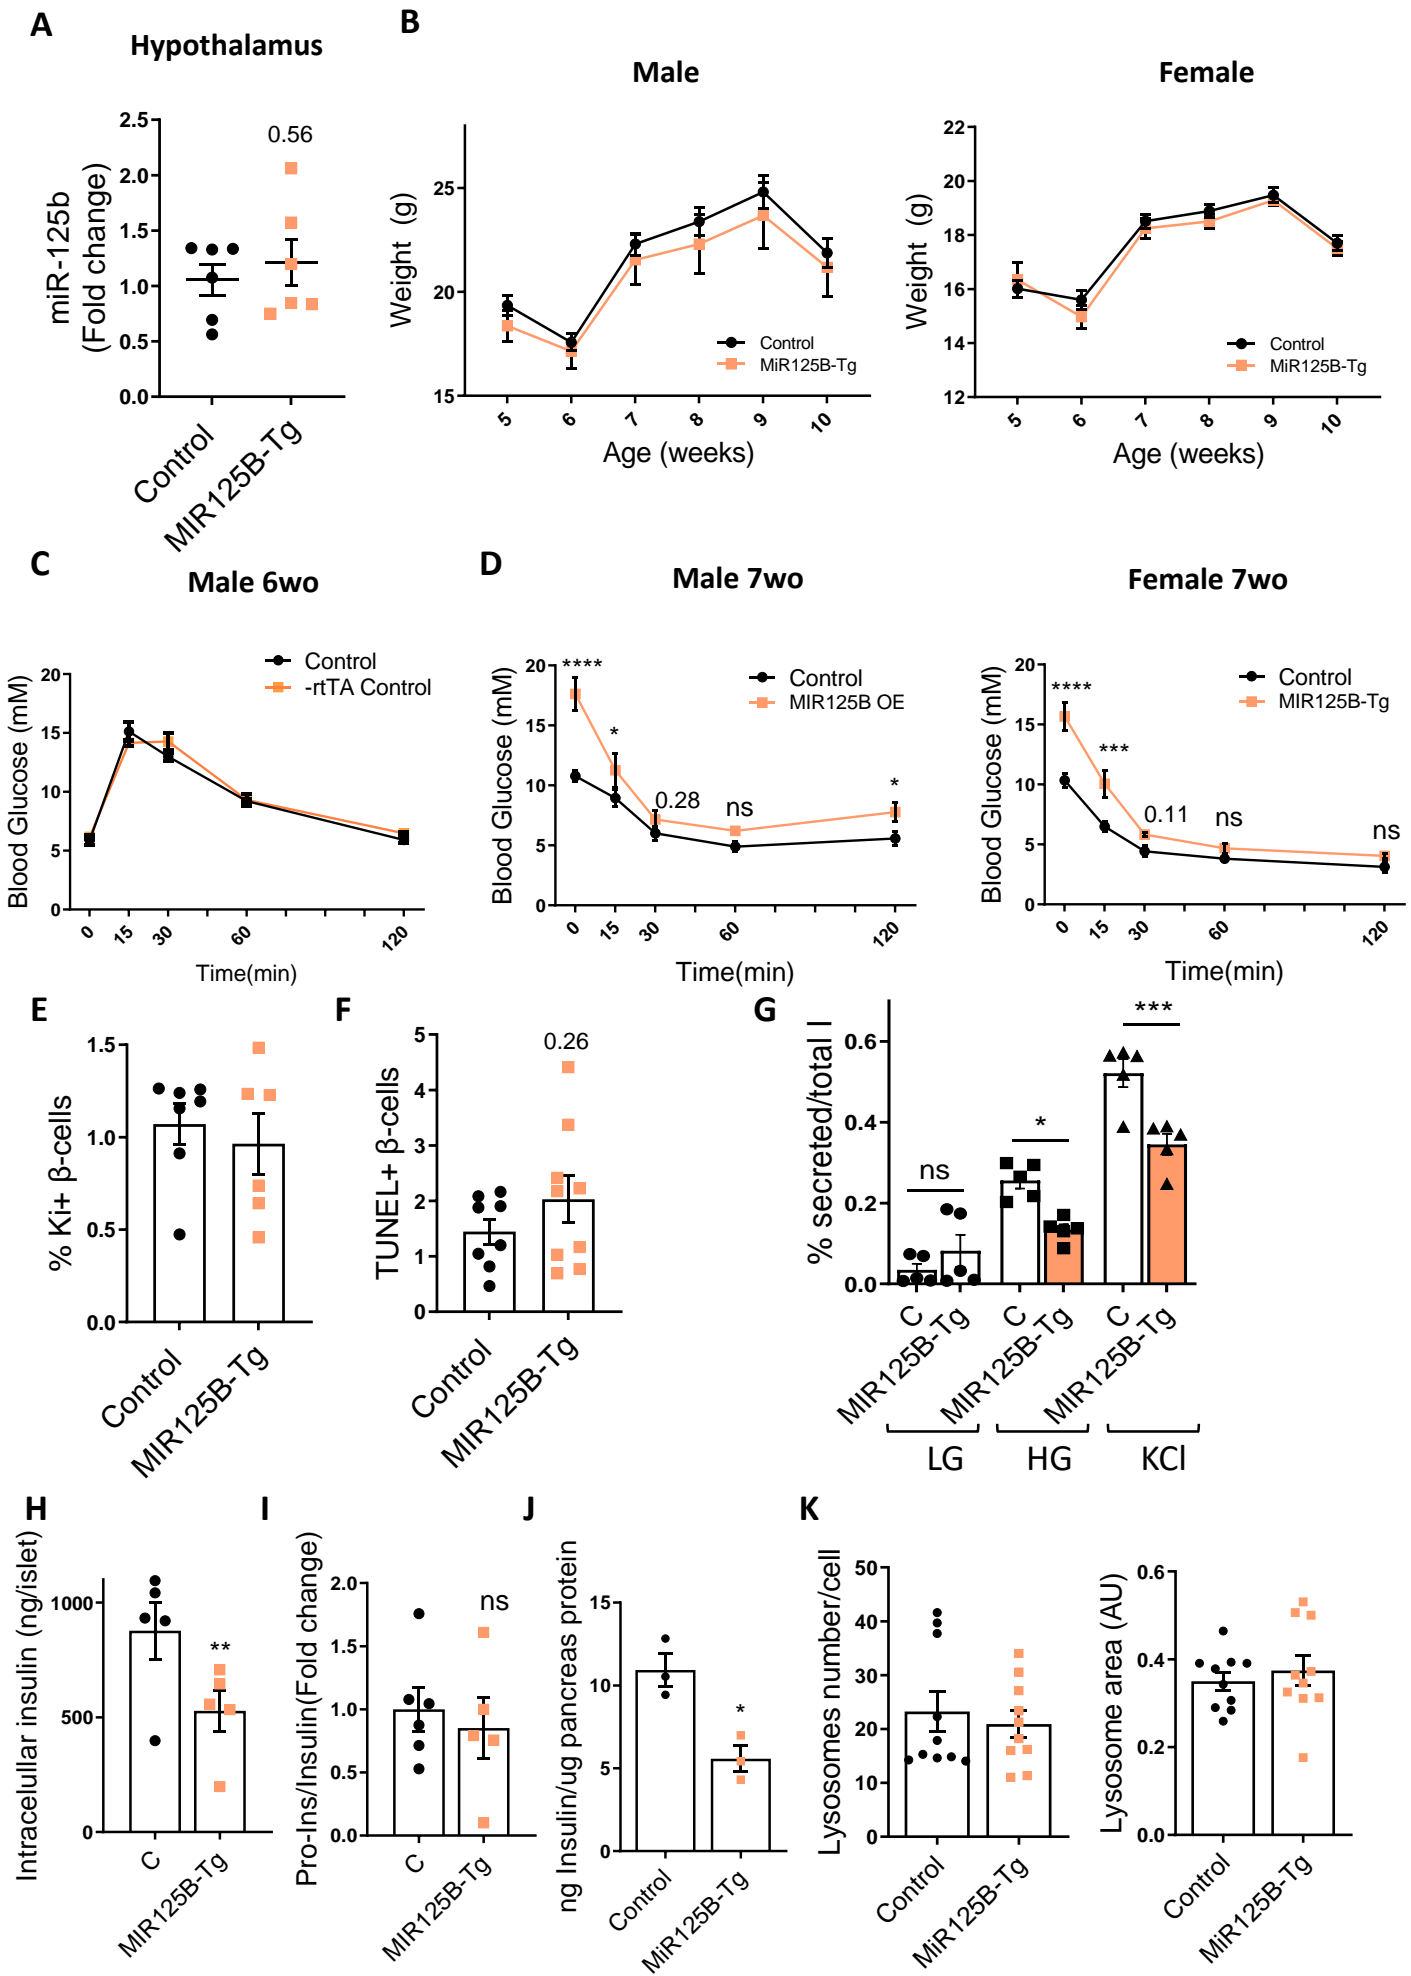

Supplemental Figure 7

A

| Insulin secretion |                | Golgi    |                | Glycoproteins |                | ER      |                |
|-------------------|----------------|----------|----------------|---------------|----------------|---------|----------------|
| Gene              | log2FoldChange | Gene     | log2FoldChange | Gene          | log2FoldChange | Gene    | log2FoldChange |
| FFAR1             | -1.21974       | EMID1    | -1.6699        | TMIGD3        | -2.00788       | EMID1   | -1.6699        |
| UCN3              | -1.19986       | MSLN     | -1.38883       | CAR15         | -1.86875       | TMED6   | -1.35608       |
| GPR119            | -1.11149       | B3GALT5  | -1.07033       | EMID1         | -1.6699        | MUC4    | -1.25905       |
| GIPR              | -0.98636       | B3GALNT1 | -0.9301        | TMIGD3        | -1.63581       | CLN6    | -1.10723       |
| SLC2A2            | -0.94807       | CNTNAP2  | -0.88555       | CDH7          | -1.52648       | B3GALT5 | -1.07033       |
| SSTR3             | -0.9436        | GALNT14  | -0.84766       | FFAR3         | -1.40117       | FMO1    | -1.01853       |
| MLXIPL            | -0.86601       | MCFD2    | -0.83908       | MSLN          | -1.38883       | SLC35D3 | -0.93592       |
| GLP1R             | -0.80968       | ZDHHC2   | -0.82524       | VWA5B1        | -1.38188       | DIO1    | -0.90529       |
| GLUL              | -0.71175       | PLK3     | -0.82351       | DCT           | -1.37076       | MCFD2   | -0.83908       |
| PDX1              | -0.67944       | BMP1     | -0.77066       | TMED6         | -1.35608       | ZDHHC2  | -0.82524       |
| KCNU1             | -0.6569        | GALNT18  | -0.75762       | MUC4          | -1.25905       | ADORA1  | -0.80935       |
| PRKCB             | -0.5862        | PCSK9    | -0.69667       | CDHR1         | -1.22122       | ELOVL2  | -0.79347       |
| NKX6-1            | -0.58541       | CHPT1    | -0.68141       | SLC40A1       | -1.22104       | GRIP1   | -0.77811       |
| CREB3L1           | -0.57256       | EGFR     | -0.6743        | FFAR1         | -1.21974       | ESYT1   | -0.75418       |
| NEUROD1           | -0.47897       | SVIP     | -0.65393       | TMPRSS4       | -1.21359       | PCSK9   | -0.69667       |
| SLC37A4           | -0.4743        | PGAP3    | -0.57013       | GCGR          | -1.20314       | EGFR    | -0.6743        |
| NKX2-2            | -0.43273       | RNF128   | -0.55974       | CPB2          | -1.10412       | SVIP    | -0.65393       |
| AACS              | -0.33216       | HEPACAM2 | -0.54779       | B3GALT5       | -1.07033       | TRAM1   | -0.62632       |
|                   |                | B3GNT3   | -0.54375       | PRRT3         | -1.00494       | G6PC2   | -0.61877       |
|                   |                | DUSP26   | -0.53542       | GIPR          | -0.98636       | GUCY2C  | -0.58323       |
|                   |                | PKDCC    | -0.53344       | SLC2A2        | -0.94807       | CREB3L1 | -0.57256       |
|                   |                | FUT10    | -0.51535       | SSTR3         | -0.9436        | PGAP3   | -0.57013       |
|                   |                | GGA2     | -0.50119       | B3GALNT1      | -0.9301        | RNF128  | -0.55974       |
|                   |                | POFUT2   | -0.47267       | CPM           | -0.90018       | SEC31A  | -0.54945       |
|                   |                | NMT2     | -0.46052       | CNTNAP2       | -0.88555       | PIGO    | -0.5264        |
|                   |                | LDLR     | -0.45331       | GPA33         | -0.88485       | LSS     | -0.50743       |
|                   |                | TMEM167  | -0.44032       | CEACAM1       | -0.86556       | ANGEL1  | -0.50638       |
|                   |                | KDELRL1  | -0.43078       | HCN4          | -0.85993       | POR     | -0.49357       |
|                   |                | TMED9    | -0.39473       | ASIC1         | -0.84837       | ATP2A3  | -0.47299       |
|                   |                | LMAN2    | -0.37793       | SLC22A23      | -0.83433       | POFUT2  | -0.47267       |
|                   |                |          |                | GLP1R         | -0.80968       | ATL2    | -0.44289       |
|                   |                |          |                | ADORA1        | -0.80935       | JPH3    | -0.44126       |
|                   |                |          |                | OTOA          | -0.80259       | KDELRL1 | -0.43078       |
|                   |                |          |                | PCSK4         | -0.79671       | HS1BP3  | -0.40551       |
|                   |                |          |                | IGFALS        | -0.77858       | TMED9   | -0.39473       |
|                   |                |          |                | BMP1          | -0.77066       | SEC61A1 | -0.39407       |
|                   |                |          |                | PLA2G2F       | -0.76601       | INSIG1  | -0.35492       |
|                   |                |          |                | SYT2          | -0.75823       |         |                |
|                   |                |          |                | FRAS1         | -0.75803       |         |                |
|                   |                |          |                | GALNT18       | -0.75762       |         |                |
|                   |                |          |                | PCSK9         | -0.69667       |         |                |
|                   |                |          |                | GGT7          | -0.67943       |         |                |
|                   |                |          |                | SLC18A1       | -0.67778       |         |                |
|                   |                |          |                | EGFR          | -0.6743        |         |                |
|                   |                |          |                | OLFM4         | -0.63233       |         |                |
|                   |                |          |                | FRZB          | -0.62688       |         |                |
|                   |                |          |                | TRAM1         | -0.62632       |         |                |
|                   |                |          |                | G6PC2         | -0.61877       |         |                |
|                   |                |          |                | PON2          | -0.61206       |         |                |
|                   |                |          |                | NEU1          | -0.60585       |         |                |
|                   |                |          |                | GUCY2C        | -0.58323       |         |                |
|                   |                |          |                | FAM174B       | -0.5764        |         |                |
|                   |                |          |                | CREB3L1       | -0.57256       |         |                |
|                   |                |          |                | SLC7A5        | -0.5722        |         |                |
|                   |                |          |                | PGAP3         | -0.57013       |         |                |
|                   |                |          |                | RNF128        | -0.55974       |         |                |
|                   |                |          |                | AMIGO2        | -0.55227       |         |                |
|                   |                |          |                | HEPACAM2      | -0.54779       |         |                |
|                   |                |          |                | B3GNT3        | -0.54375       |         |                |
|                   |                |          |                | GALR1         | -0.5343        |         |                |
|                   |                |          |                | PKDCC         | -0.53344       |         |                |
|                   |                |          |                | PIGO          | -0.5264        |         |                |
|                   |                |          |                | GRIN2C        | -0.52029       |         |                |
|                   |                |          |                | FUT10         | -0.51535       |         |                |
|                   |                |          |                | TSPAN5        | -0.51337       |         |                |
|                   |                |          |                | ADRA2A        | -0.50873       |         |                |
|                   |                |          |                | QSOX2         | -0.50759       |         |                |
|                   |                |          |                | SIRPA         | -0.4979        |         |                |
|                   |                |          |                | TMEM231       | -0.4879        |         |                |
|                   |                |          |                | POFUT2        | -0.47267       |         |                |
|                   |                |          |                | LDLR          | -0.45331       |         |                |
|                   |                |          |                | NAGA          | -0.44593       |         |                |
|                   |                |          |                | GALNS         | -0.44077       |         |                |
|                   |                |          |                | TMEM167       | -0.44032       |         |                |
|                   |                |          |                | PXMP4         | -0.43529       |         |                |
|                   |                |          |                | TTYH2         | -0.43377       |         |                |
|                   |                |          |                | TMEM8         | -0.42853       |         |                |
|                   |                |          |                | LRFN4         | -0.42305       |         |                |
|                   |                |          |                | SLC29A1       | -0.4132        |         |                |
|                   |                |          |                | TMED9         | -0.39473       |         |                |
|                   |                |          |                | INA           | -0.38035       |         |                |
|                   |                |          |                | LMAN2         | -0.37793       |         |                |
|                   |                |          |                | GNS           | -0.31404       |         |                |

Supplemental Figure 7

B

| Phosphoproteins |                | Axon   |                | Glycoproteins |                | Golgi      |                |
|-----------------|----------------|--------|----------------|---------------|----------------|------------|----------------|
| Gene            | log2FoldChange | Gene   | log2FoldChange | Gene          | log2FoldChange | Gene       | log2FoldChange |
| PGM5            | 3.384586       | SRCIN1 | 2.143274       | KCNK13        | 3.078916       | P3H2       | 1.6516         |
| SRCIN1          | 2.143274       | SLC5A7 | 1.915163       | SMOC1         | 3.040074       | FGFR2      | 1.626991       |
| CRMP1           | 1.994343       | NEFL   | 1.735895       | GABRP         | 2.117097       | SCARA3     | 1.465067       |
| SLC5A7          | 1.915163       | NTM    | 1.73145        | PDGFC         | 2.040732       | FGFR3      | 1.453484       |
| CDH6            | 1.903529       | CALB1  | 1.523657       | WNT7B         | 2.036377       | EHF        | 1.447345       |
| STUM            | 1.866269       | SYT1   | 1.382168       | DLK1          | 1.917689       | ST6GALNAC2 | 1.424805       |
| LSAMP           | 1.856173       | DTNA   | 1.313236       | SLC5A7        | 1.915163       | MAL        | 1.395117       |
| NEFL            | 1.735895       | HTR3A  | 1.286413       | CDH6          | 1.903529       | SYT1       | 1.382168       |
| NOS1            | 1.714182       | ATP1A3 | 1.274655       | EVC2          | 1.875716       | ATP1A3     | 1.274655       |
| ILAVL2          | 1.708331       | KIF5A  | 1.178635       | AQP5          | 1.864548       | CD14       | 1.25192        |
| ILDR2           | 1.683182       | NCS1   | 1.150788       | LSAMP         | 1.856173       | HSPB8      | 1.18827        |
| FGFR2           | 1.626991       | PYGB   | 1.134098       | COL27A1       | 1.820278       | NCS1       | 1.150788       |
| CHL1            | 1.625863       | TUBB3  | 1.132731       | NEFL          | 1.735895       | ST3GAL4    | 1.101342       |
| DOC2B           | 1.57419        | KCNA6  | 1.107624       | NTM           | 1.73145        | PLCE1      | 1.081234       |
| ARHGAP6         | 1.569496       | TGFB2  | 1.089331       | P3H2          | 1.6516         | TMEM59L    | 1.052226       |
| DPYSL5          | 1.556181       | CNR1   | 1.044278       | FGFR2         | 1.626991       | RAB27B     | 1.049924       |
| DPYSL3          | 1.537004       | SNCA   | 1.021912       | CHL1          | 1.625863       | SNCA       | 1.021912       |
| MAPK4           | 1.528335       | PALLD  | 1.01456        | FLRT3         | 1.616883       | ACHE       | 0.974595       |
| MAP1A           | 1.510319       | ACHE   | 0.974595       | TNFRSF19      | 1.564367       | APC2       | 0.974186       |
| PCP4L1          | 1.467693       | KCNA2  | 0.881891       | TGFB3         | 1.547986       | ST6GALNAC2 | 0.973201       |
| FGFR3           | 1.453484       | SEMA6A | 0.765375       | MFAP2         | 1.547205       | IL17RD     | 0.969734       |
| DCX             | 1.442323       | PALM   | 0.764501       | KL            | 1.482683       | PTGS1      | 0.958713       |
| SH3PXD2B        | 1.433606       | ALCAM  | 0.751319       | SCNN1A        | 1.469131       | SMO        | 0.944786       |
| TIAM1           | 1.431407       | MAPT   | 0.723769       | SCARA3        | 1.465067       | ECE2       | 0.943918       |
| ADGRG6          | 1.431193       | KCNH1  | 0.683248       | FGFR3         | 1.453484       | PLD1       | 0.928606       |
| PLCD3           | 1.425484       | MYH10  | 0.679126       | ADGRG6        | 1.431193       | CDC42EP1   | 0.843105       |
| EPN3            | 1.423582       | CTNNA2 | 0.629709       | ST6GALNAC2    | 1.424805       | PTGFRN     | 0.841552       |
| LEPR            | 1.415607       | APP    | 0.491763       | LEPR          | 1.415607       | CAV2       | 0.825733       |
| COL18A1         | 1.388956       | CPT1C  | 0.468435       | FLRT2         | 1.413927       | PARM1      | 0.821136       |
| SYT1            | 1.382168       | MAP2K1 | 0.348694       | COL18A1       | 1.388956       | MDFIC      | 0.808626       |
| KLHDC7A         | 1.380444       |        |                | SYT1          | 1.382168       | GJA1       | 0.773144       |
| ADCYAP1R1       | 1.373177       |        |                | KLHDC7A       | 1.380444       | EMP2       | 0.77238        |
| CARD10          | 1.365265       |        |                | ADCYAP1R1     | 1.373177       | SMPD3      | 0.70152        |
| FERMT1          | 1.35601        |        |                | COL9A2        | 1.358039       | CREG2      | 0.699238       |
| SULT1A1         | 1.332353       |        |                | INHBA         | 1.342248       | SORL1      | 0.657576       |
| SOX5            | 1.322169       |        |                | OLFML2B       | 1.305021       | IRGM2      | 0.639081       |
| DTNA            | 1.313236       |        |                | ERBB2         | 1.297039       | LARGE1     | 0.63514        |
| ERBB2           | 1.297039       |        |                | HTR3A         | 1.286413       | SPRY1      | 0.627566       |
| CLDN2           | 1.285768       |        |                | SPOCK3        | 1.280884       | ZDHHC9     | 0.614026       |
| DPP10           | 1.276844       |        |                | DPP10         | 1.276844       | RAB31      | 0.612486       |
| ATP1A3          | 1.274655       |        |                | ANO1          | 1.269384       | APP        | 0.491763       |
| ANO1            | 1.269384       |        |                | CD14          | 1.25192        | ENTPD6     | 0.398712       |
| SFN             | 1.249896       |        |                | CP            | 1.229932       | MAP2K1     | 0.348694       |
| REEP1           | 1.237442       |        |                | PRELP         | 1.209164       |            |                |
| HSPB8           | 1.18827        |        |                | LAMA5         | 1.189775       |            |                |
| EVPL            | 1.18489        |        |                | SNED1         | 1.153812       |            |                |
| SHROOM1         | 1.183754       |        |                | LYNX1         | 1.1496         |            |                |
| KIF5A           | 1.178635       |        |                | GDF10         | 1.140987       |            |                |
| CLMN            | 1.166565       |        |                | SDC1          | 1.128319       |            |                |
| PYGB            | 1.134098       |        |                | APCDD1        | 1.128          |            |                |
| TUBB3           | 1.132731       |        |                | KIRREL        | 1.122798       |            |                |
| SDC1            | 1.128319       |        |                | ST3GAL4       | 1.101342       |            |                |
| BACH2           | 1.128003       |        |                | LGI2          | 1.099607       |            |                |
| KIRREL          | 1.122798       |        |                | SLC52A3       | 1.098478       |            |                |
| AMOT            | 1.110241       |        |                | TGFB2         | 1.089331       |            |                |
| DCLK1           | 1.110144       |        |                | ARNTL         | 1.083724       |            |                |
| KCNA6           | 1.107624       |        |                | ADAMTSL4      | 1.083002       |            |                |
| STRIP2          | 1.102385       |        |                | KCNQ1         | 1.075632       |            |                |
| KCNN4           | 1.099209       |        |                | SEMA3B        | 1.073551       |            |                |
| SLC52A3         | 1.098478       |        |                | TMEM59L       | 1.052226       |            |                |
| HK1             | 1.093945       |        |                | SLIT2         | 1.051137       |            |                |
| WWC1            | 1.085285       |        |                | RNF43         | 1.046204       |            |                |
| ARNTL           | 1.083724       |        |                | CNR1          | 1.044278       |            |                |
| PLCE1           | 1.081234       |        |                | GAS6          | 1.032908       |            |                |
| PALMD           | 1.078257       |        |                | PLAUR         | 1.030368       |            |                |
| KCNQ1           | 1.075632       |        |                | PLAT          | 1.02416        |            |                |
| PTPN14          | 1.064004       |        |                | AGRN          | 1.020408       |            |                |
| MMP14           | 1.0492         |        |                | NOTCH2        | 1.013127       |            |                |
| CNR1            | 1.044278       |        |                | ENPP3         | 1.011407       |            |                |
| HMGCS2          | 1.043029       |        |                | HAPLN1        | 1.011075       |            |                |
| KCNQ2           | 1.039918       |        |                | SEMA3C        | 1.009993       |            |                |
| GAS6            | 1.032908       |        |                | SEMA4F        | 1.007728       |            |                |
| PLS3            | 1.031522       |        |                | CRIM1         | 1.003023       |            |                |

Supplemental Figure 8

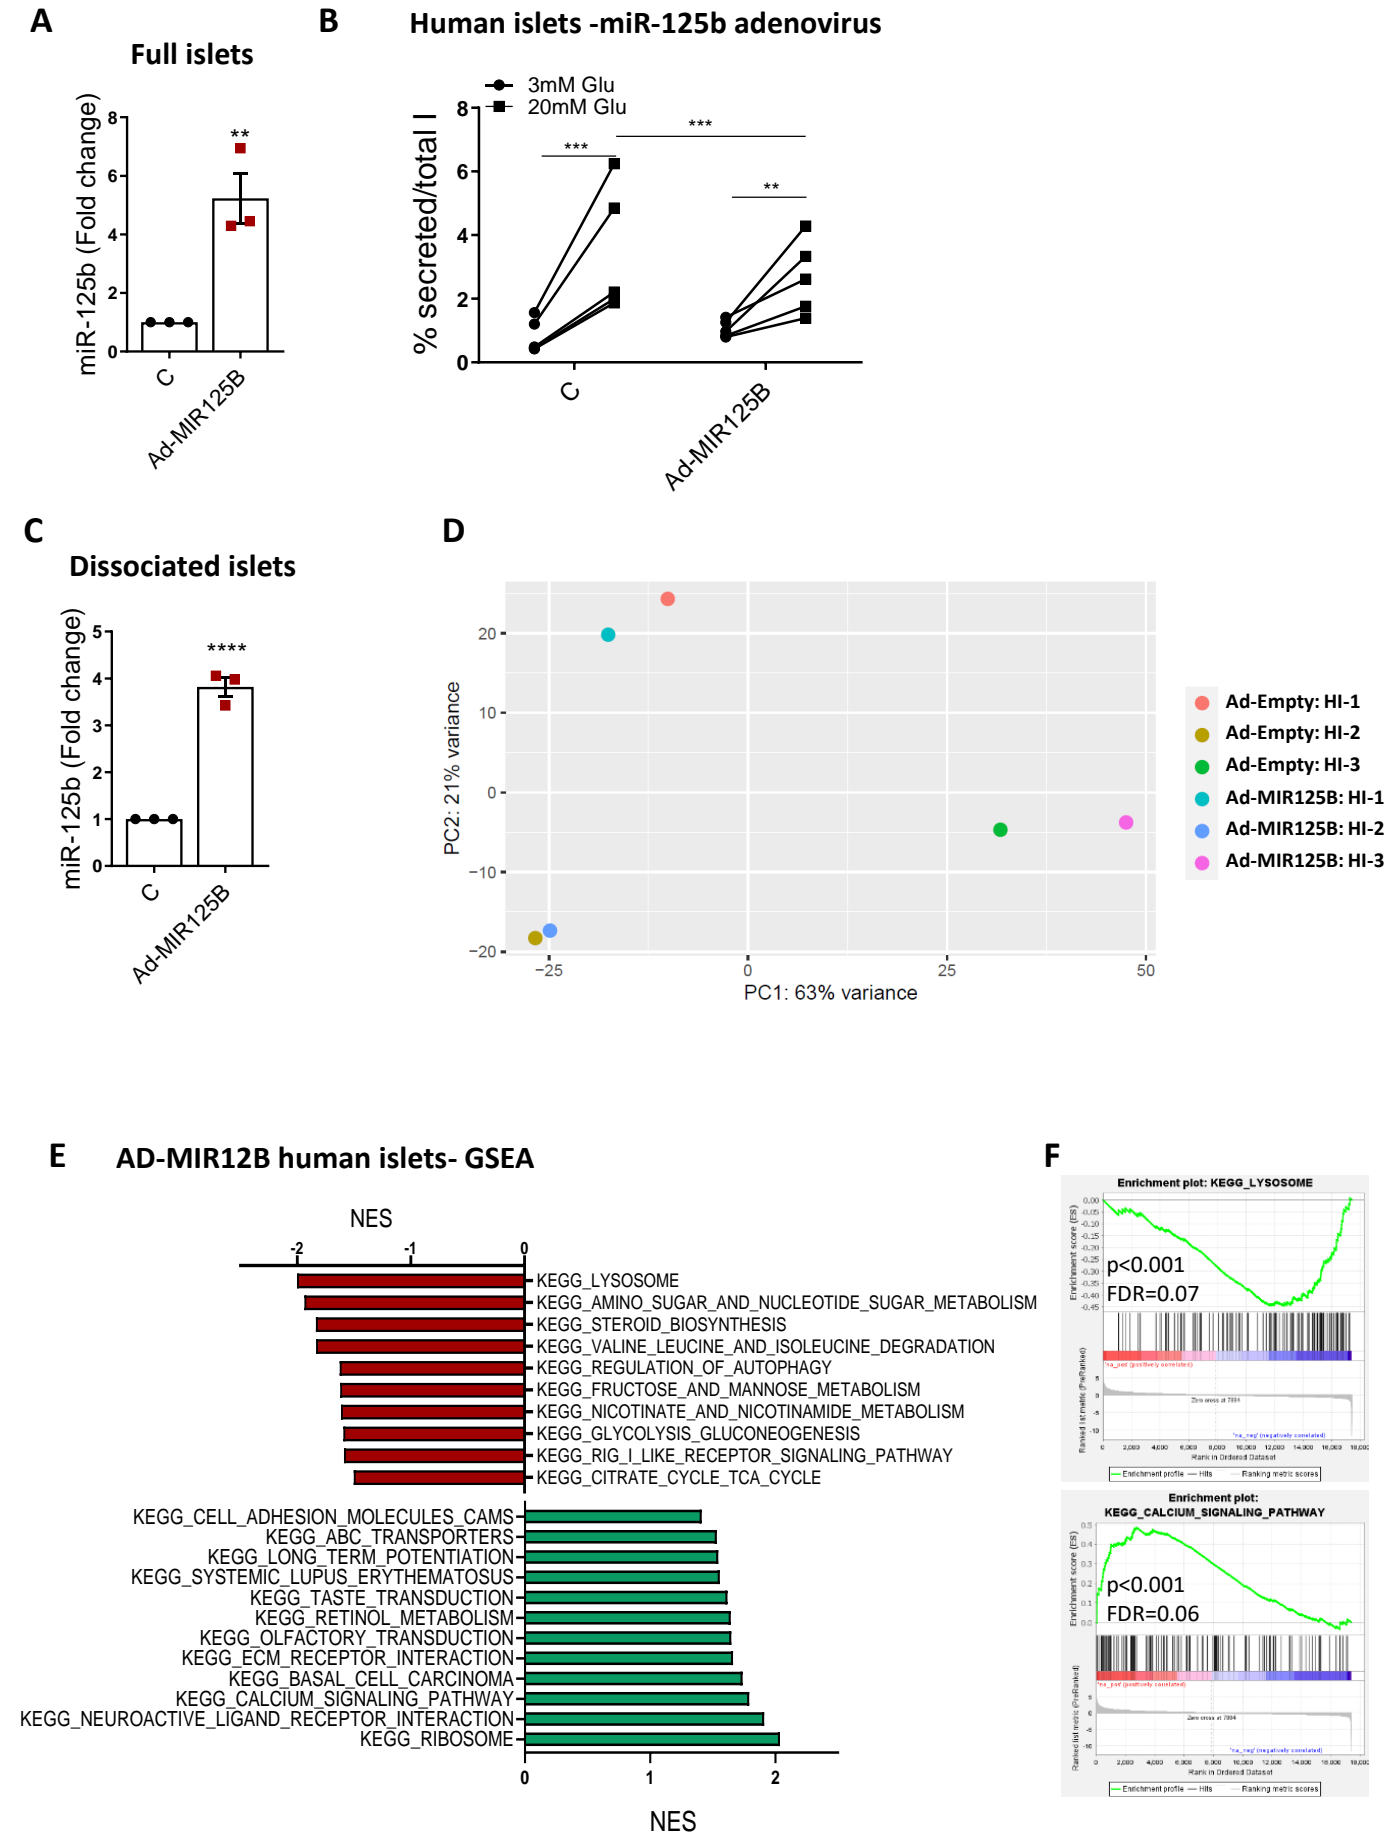

Supplement: Supplementary file 2 [file 1]
