# Supplementary material
Source: publisher figshare collection journal article supplement (https://diabetesjournals.figshare.com/articles/dataset/_/19609827)
Supplement: Supplementary file 3 [file 1]

**Supplemental Table 9. Donor characteristics of human islets as provided by the isolation center.**

| Identifier | BMI<br>(Kg/m <sup>2</sup> ) | Age | Sex    | Origin (Facility)            |
|------------|-----------------------------|-----|--------|------------------------------|
| P43        | 27.4                        | 72  | Male   | Pisa, Italy                  |
| P59        | 21.5                        | 68  | Male   | Pisa, Italy                  |
| P60        | 27.8                        | 61  | Male   | Milano, Italy                |
| P66        | 31                          | 52  | Male   | Pisa, Italy                  |
| P74        | 24.5                        | 83  | Male   | Pisa, Italy                  |
| P76        | 22.9                        | 75  | Male   | Pisa, Italy                  |
| P80        | 35                          | 54  | Male   | Edmonton, Cananda (McDonald) |
| P81        | 29.7                        | 65  | Male   | Edmonton, Cananda (McDonald) |
| P84        | NS                          | 89  | Male   | Pisa, Italy                  |
| P86        | 23                          | 41  | Male   | Leiden, Netherlands          |
| P89        | 24.5                        | 64  | Male   | Pisa, Italy                  |
| P94        | 29.4                        | 51  | Male   | Edmonton, Cananda (McDonald) |
| P95        | 42.60                       | 38  | Male   | Edmonton, Cananda (McDonald) |
| P97        | 28.7                        | 62  | Male   | Edmonton, Cananda (Shapiro)  |
| P100       | 32.6                        | 42  | Male   | Pisa, Italy                  |
| P112       | 28.8                        | 69  | Male   | Edmonton, Cananda (McDonald) |
| P115       | 30.5                        | 27  | Male   | Edmonton, Cananda (Shapiro)  |
| P118       | 28.4                        | 68  | Male   | Pisa, Italy                  |
| P119       | 29.4                        | 49  | Male   | Edmonton, Cananda (Shapiro)  |
| P124       | 22.9                        | 18  | Male   | Edmonton, Cananda (Shapiro)  |
| P125       | 24.5                        | 75  | Male   | Pisa, Italy                  |
| P128       | 22.5                        | 74  | Male   | Pisa, Italy                  |
| P119       | 29.4                        | 49  | Male   | Edmonton, Cananda (Shapiro)  |
| P130       | 23.2                        | 84  | Male   | Pisa, Italy                  |
| P131       | 32                          | 56  | Male   | Milano, Italy                |
| P132       | 24                          | 57  | Male   | Oxford, UK                   |
| P136       | 19.8                        | 59  | Male   | Pisa, Italy                  |
| P138       | 21.6                        | 63  | Male   | Milano, Italy                |
| P140       | 23                          | 41  | Male   | Leiden, Netherlands          |
| P141       | 31                          | 45  | Male   | Leiden, Netherlands          |
| P142       | 31.2                        | 71  | Female | Pisa, Italy                  |
| P148       | 26.4                        | 66  | Male   | Pisa, Italy                  |
| P152       | 33.8                        | 44  | Male   | Edmonton, Cananda (McDonald) |
| P28        | NS                          | 69  | Female | Edmonton, Cananda (Shapiro)  |
| P36        | 25.2                        | 37  | Female | Geneva, Switzerland          |
| P41        | 17.9                        | 58  | Female | Edmonton, Canada (Shapiro)   |
| P42        | 21                          | 23  | Female | Edmonton, Canada (Shapiro)   |
| P77        | 33.1                        | 66  | Female | Edmonton, Cananda (McDonald) |

|      |      |    |        |                              |
|------|------|----|--------|------------------------------|
| P85  | 23.9 | 62 | Female | Pisa, Italy                  |
| P87  | 23   | 66 | Female | Pisa, Italy                  |
| P93  | 26   | 57 | Female | Milano, Italy                |
| P102 | 31.5 | 78 | Female | Edmonton, Cananda (Shapiro)  |
| P106 | 20.6 | 49 | Female | Milano, Italy                |
| P113 | 32.3 | 30 | Female | Edmonton, Cananda (McDonald) |
| P114 | 35   | 46 | Female | Oxford, UK                   |
| P116 | 26   | 55 | Female | Milano, Italy                |
| P117 | 24.5 | 52 | Female | Milano, Italy                |
| P120 | 25.8 | 58 | Female | Pisa, Italy                  |
| P123 | 22   | 88 | Female | Pisa, Italy                  |
| P126 | 18.5 | 66 | Female | Edmonton, Cananda (McDonald) |
| P134 | 44.1 | 51 | Female | Geneva, Switzerland          |
| P137 | 28.2 | 84 | Female | Pisa, Italy                  |
| P142 | 31.2 | 71 | Female | Pisa, Italy                  |
| P144 | 31.2 | 49 | Female | Pisa, Italy                  |
| P145 | 25.7 | 78 | Female | Pisa, Italy                  |
| P146 | 31.9 | 73 | Female | Strasbourg, France           |

Donors used for C991/C13 experiments (Figure 1E): P28, P36, P41, P42, P43

Donors used for Ad-AMPK-DN experiments (Figure 1E): P41, P43, P144 and P146

Donors used for effect of glucose on miR-125b expression (Figure 1A): P59, P80, P85, P95, P106, P114 and P116

Donors used for GSIS (Figure 1C): P144 and P146

Donors used for analysis of M6PR expression: P144, P145 and P146.

Donors used for RNAseq (Figure S8): P130, P132 and P138

All other samples used for correlation of miR-125b with BMI/Age/Sex (Figure 1b, Sup Figure 1)
